# Supplementary material for: Characterization of HIV variants from paired Cerebrospinal fluid and Plasma samples in primary microglia and CD4+ T-cells
Source: Springer Nature journal article supplement (doi:10.1007/s13365-024-01207-w), 2024-05-07
Supplement: MOESM1 [file 27065204]

**Supplementary table 1: Neurological diagnosis and ART history of subject population**

| Subject ID | Subtype  | Indication for CSF puncture <sup>a</sup> | Serum THPA | Serum VDRL | CSF THPA | CSF VDRL | Neurological symptoms <sup>b</sup>                              | ART history                           | Time off-treatment <sup>c</sup> | Year of diagnosis |
|------------|----------|------------------------------------------|------------|------------|----------|----------|-----------------------------------------------------------------|---------------------------------------|---------------------------------|-------------------|
| 1          | B        | Exclusion NS                             | 640/pos    | 4/neg      | 4/pos    | <4/neg   | -                                                               | -                                     |                                 | 2006              |
| 2          | B        | Exclusion NS                             | -          | <4/neg     |          | <4/neg   | -                                                               | -                                     |                                 | 2006              |
| 3          | B        | Exclusion NS                             | >2560/pos  | 32/pos     | 512/pos  | <4/neg   | -                                                               | -                                     |                                 | 2003              |
| 4          | B        | Symptoms, other than neurological        | <80/neg    | -          | <4/neg   | -        | -                                                               | 3TC, ZDV, RTV, d4T, SQV, ddl          | >1 year                         | 1992              |
| 6          | CRF02_AG | Symptoms                                 | <80/neg    | -          | -        | -        | Dizziness and confusion                                         | -                                     |                                 | 2003              |
| 7          | B        | Exclusion NS                             | >2560/pos  | 320/pos    | 8/pos    | <4/neg   | -                                                               | -                                     |                                 | 2004              |
| 8          | B        | Symptoms                                 | 1280/pos   | <4/neg     | -        | -        | Cryptococcal meningitis                                         | -                                     |                                 | Unknown           |
| 10         | B        | Pain extremities                         | 80/pos     | <4/neg     | <4/neg   | <4/neg   | -                                                               | -                                     |                                 | 2005              |
| 12         | B        | Exclusion NS                             | 320/pos    | 8/pos      | 16/pos   | <4/neg   | -                                                               | -                                     |                                 | 2008              |
| 13         | B        | Symptoms                                 | <80/neg    | -          | -        | -        | Balance disturbances, weakness extremities                      | 3TC, ABC, NFV                         | > 1 month                       | Unknown           |
| 14         | B        | Symptoms                                 | >2560/pos  | 4/pos      | 128/pos  | <4/neg   | Cognitive problems                                              | -                                     |                                 | 2007              |
| 16         | B        | Symptoms                                 | <80/neg    | -          | <4/neg   | <4/neg   | Progressive spinal cord lesion                                  | -                                     |                                 | 2009              |
| 17         | B        | Symptoms                                 | <80/neg    | -          | -        | -        | HIV encephalopathy                                              | ZDV, RTV, ddl                         | > 10 years                      | 1994              |
| 18         | B        | Symptoms                                 | -          | -          | -        | -        | Seizures                                                        | 3TC, ZDV, NVP                         | 1 month                         | 1999              |
| 19         | B        | Exclusion NS                             | >2560/pos  | 8/pos      | 8/pos    | <4/neg   | -                                                               | -                                     |                                 | 2007              |
| 20         | B        | Exclusion NS                             | >2560/pos  | 32/pos     | 8/pos    | <4neg    | -                                                               | -                                     |                                 | 2011              |
| 21         | B        | Symptoms                                 | <80/neg    | -          | <4/neg   | <4/neg   | Radicular pain                                                  | ZDV, 3TC, TDF, LPV/r                  | 1 year                          | 2002              |
| 25         | CRF12_BF | Symptoms                                 | -          | -          | -        | -        | Headache, facialis paresis                                      | -                                     |                                 | 2016              |
| 27         | B        | Symptoms                                 | <80/neg    | -          | <4neg    | -        | Behavioral changes and aspecific white matter anomalies in Pons | Several, most recent: DRV/r, MVC, ETR | < 4 months                      | 1994              |

**Footnotes:**

a Indication for lumbar puncture varied. Exclusion NS = Exclusion of neurosyphilis as part of standard clinical practice.

b Neurological diagnosis or symptoms. - = no neurological symptoms

c Time between cessation of ART and specimen collection
